# Supplementary material for: Functional gains in energy and cell metabolism after TSPO gene insertion
Source: PubMed Central journal article supplement — Cell Cycle. 2017 Jan 19;16(5):436–47. doi: 10.1080/15384101.2017.1281477 (PMC5351937; doi:10.1080/15384101.2017.1281477), 2017-01-19
Supplement: kccy-16-05-1281477-s001.pdf [file kccy-16-05-1281477-s001.pdf]

**Supplemental Table 1. Identification of wild-type Jurkat cells (Jurkat W) using short tandem repeat (STR) profiling.**

**CellBank Australia**  
Certificate of Analysis, Identification Testing  
(Human cell line)

**STR Profile – Sample**

| Sample Name | Jurkat W       |
|-------------|----------------|
| Source      | 11-088         |
| D8S1179     | 13,14          |
| D21S11      | 31.2,33.2,34.2 |
| D7S820      | 8,10           |
| CSF1PO      | 11,12          |
| D3S1358     | 15             |
| TH01        | 6,9.3          |
| D13S317     | 8,12           |
| D16S539     | 11             |
| D2S1338     | 19,23          |
| D19S433     | 14,14.2,15.2   |
| vWA         | 17,18,19       |
| TPOX        | 8,10           |
| D18S51      | 13,21          |
| Amel        | X,Y            |
| D5S818      | 9              |
| FGA         | 20,21          |

**– Reference/Repository Sample**

| Sample Name | Jurkat, Clone E6-1 |
|-------------|--------------------|
| Source      | ATCC: TIB-152      |
| D8S1179     |                    |
| D21S11      |                    |
| D7S820      | 8,12               |
| CSF1PO      | 11,12              |
| D3S1358     |                    |
| TH01        | 6,9.3              |
| D13S317     | 8,12               |
| D16S539     | 11                 |
| D2S1338     |                    |
| D19S433     |                    |
| vWA         | 18                 |
| TPOX        | 8,10               |
| D18S51      |                    |
| Amel        | X,Y                |
| D5S818      | 9                  |
| FGA         |                    |

**Comments**

Full profile generated:  
 - out of 9 loci, 14/17 (82%) alleles were identical to Jurkat, Clone E6-1 (ATCC: TIB-152)  
 - this is consistent with genetic drift over passaging, within the scientific literature samples are usually thought to match if >80% of alleles are identical  
 - please note also that Jurkat is known to be genetically unstable in culture and the profile generated here is consistent with STR alterations that have been published for this line

## Supplemental Table 2. PCR Primers

| RT-qPCR primers                   |                                    |                                   |           |
|-----------------------------------|------------------------------------|-----------------------------------|-----------|
| Gene                              | Forward primer (5'-3')             | Reverse primer (5'-3')            | Reference |
| exogenous<br><i>TSPO</i>          | AGCAGATTCGTGCACGGCGAGGGC<br>CTGA   | GGCAGCAGCGCCAGACACCAGCAG<br>CAGG  | 1.        |
| endogenous<br><i>TSPO</i>         | CACGCTCTACTCAGCCATGG               | GCAGTAGTTGAGTGTGGTCGC             | 1.        |
| <i>Beta-actin</i>                 | GTGGGGCGCCCCAGGCACCA               | CTCCTTAATGTCACGCACGATTTC          | 2.        |
| <i>GAPDH</i>                      | CCATGGAGAAGGCTGGGG                 | CAAAGTTGTCATGGATGACC              | 3.        |
| <i>COX IV</i><br><i>subunit 2</i> | CAGGAAATAGAAACCGTCTGAACTATCC<br>TG | CTGTGGTTTGCTCCACAGATTCAGTGC<br>AT | 2         |

1. Ha et al. (2007) *Phytomedicine*. 14:232-235
2. Cheng et al. (2003) *J Agric Food Chem*. 51:7276-7279
3. Dveksler et al. (1992) *PCR methods and applications*. 1:283-285

**Supplemental Table 3. Identification of TSPO Jurkat cells (Jurkat T) using short tandem repeat (STR) profiling.**

**CellBank Australia**  
Certificate of Analysis, Identification Testing  
(Human cell line)

*STR Profile – Sample*

| Sample Name | Jurkat T            |
|-------------|---------------------|
| Source      | 11-090              |
| D8S1179     | 13,14               |
| D21S11      | 30.2,31.2,33.2,34.2 |
| D7S820      | 8,10                |
| CSF1PO      | 11,12               |
| D3S1358     | 15                  |
| TH01        | 6,9,3               |
| D13S317     | 8,12                |
| D16S539     | 11                  |
| D2S1338     | 19,23               |
| D19S433     | 14,14.2,15.2        |
| vWA         | 17,18,19            |
| TPOX        | 8,10                |
| D18S51      | 13,21               |
| Amel        | X,Y                 |
| D5S818      | 9                   |
| FGA         | 20,21               |

*– Reference/Repository Sample*

| Sample Name | Jurkat, Clone E6-1 |
|-------------|--------------------|
| Source      | ATCC: TIB-152      |
| D8S1179     |                    |
| D21S11      |                    |
| D7S820      | 8,12               |
| CSF1PO      | 11,12              |
| D3S1358     |                    |
| TH01        | 6,9,3              |
| D13S317     | 8,12               |
| D16S539     | 11                 |
| D2S1338     |                    |
| D19S433     |                    |
| vWA         | 18                 |
| TPOX        | 8,10               |
| D18S51      |                    |
| Amel        | X,Y                |
| D5S818      | 9                  |
| FGA         |                    |

**Comments**

Full profile generated:  
 - out of 9 loci, 14/17 (82%) alleles were identical to Jurkat, Clone E6-1 (ATCC: TIB-152)  
 - this is consistent with genetic drift over passaging, within the scientific literature samples are usually thought to match if >80% of alleles are identical  
 - please note also that Jurkat is known to be genetically unstable in culture and the profile generated here is consistent with STR alterations that have been published for this line
